# Supplementary material for: Analysis of pre-symptomatic Drosophila models for ALS and SMA reveals convergent impact on functional protein complexes linked to neuro-muscular degeneration
Source: bioRxiv or medRxiv preprint supplement (doi:10.1101/2022.06.20.496821), 2022-08-04

**A**

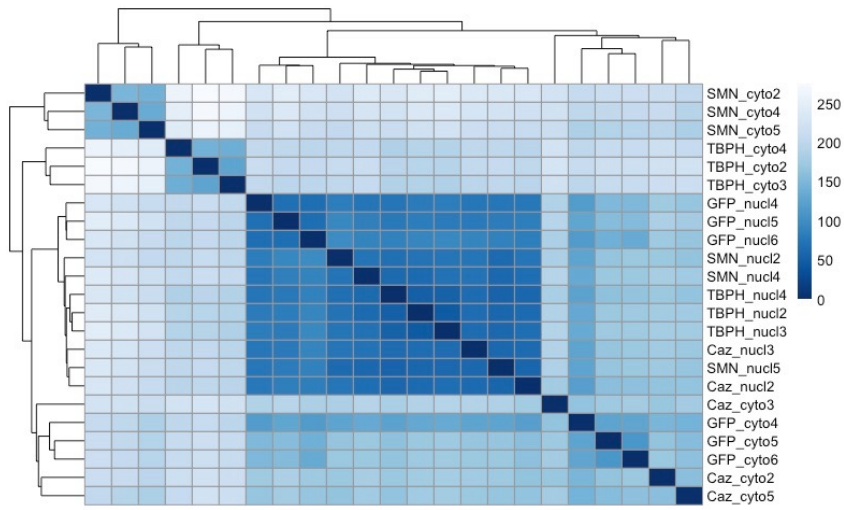

**B**

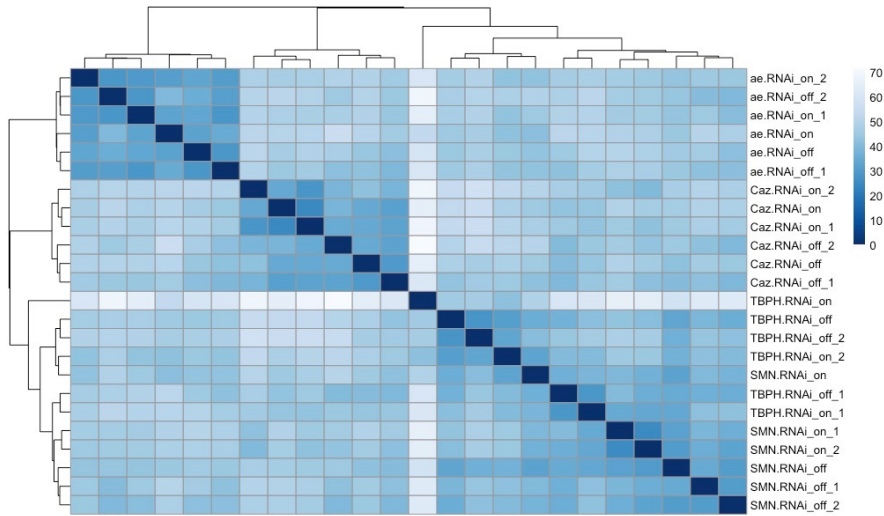

**C**

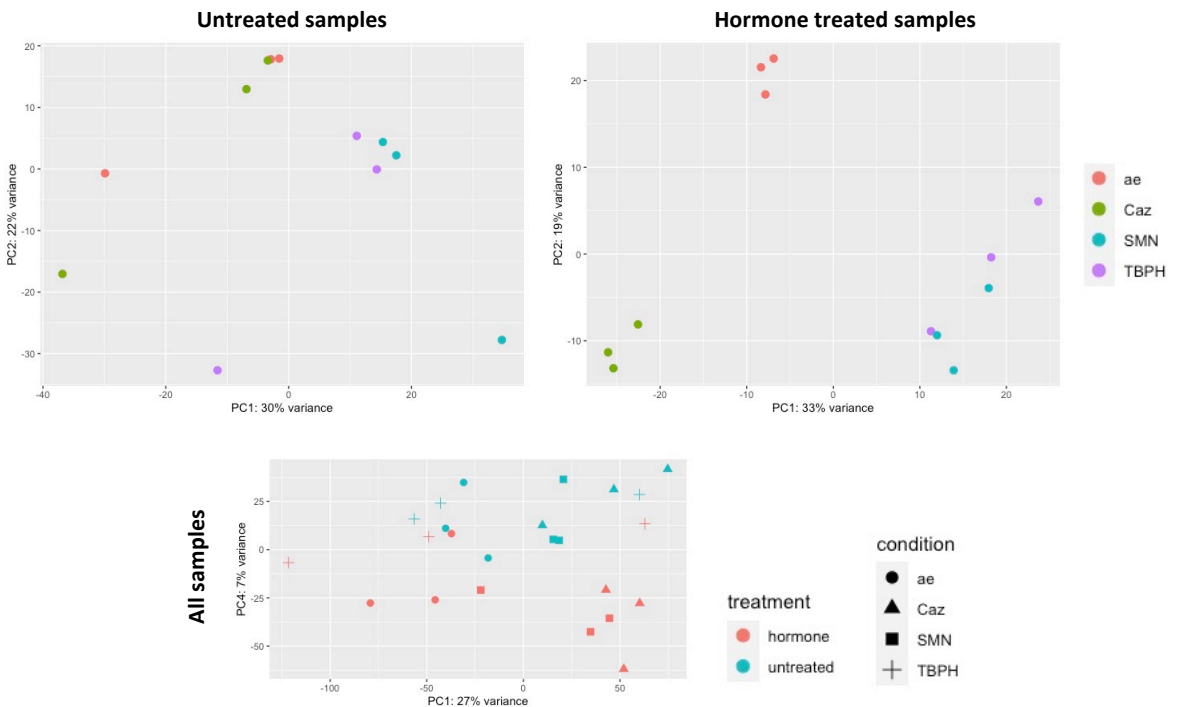

Supplement: Supplementary file [file media-2.pdf]
