# Supplementary material for: Analysis of pre-symptomatic Drosophila models for ALS and SMA reveals convergent impact on functional protein complexes linked to neuro-muscular degeneration
Source: bioRxiv or medRxiv preprint supplement (doi:10.1101/2022.06.20.496821), 2022-08-04

### A Brain-expressed transcripts filtering

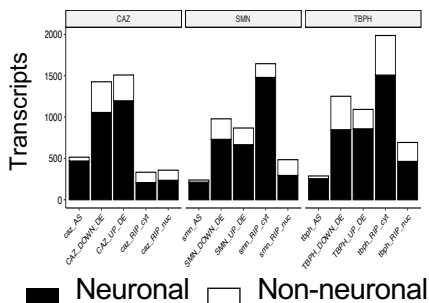

### B Gene Ontology BP Top 7 enrichment

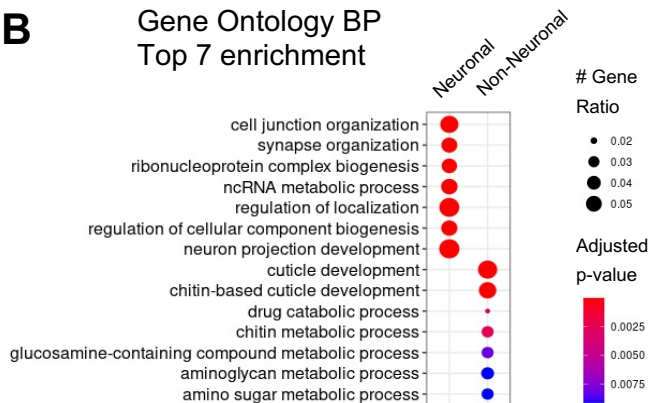

### C Non-neuronal transcripts expression density

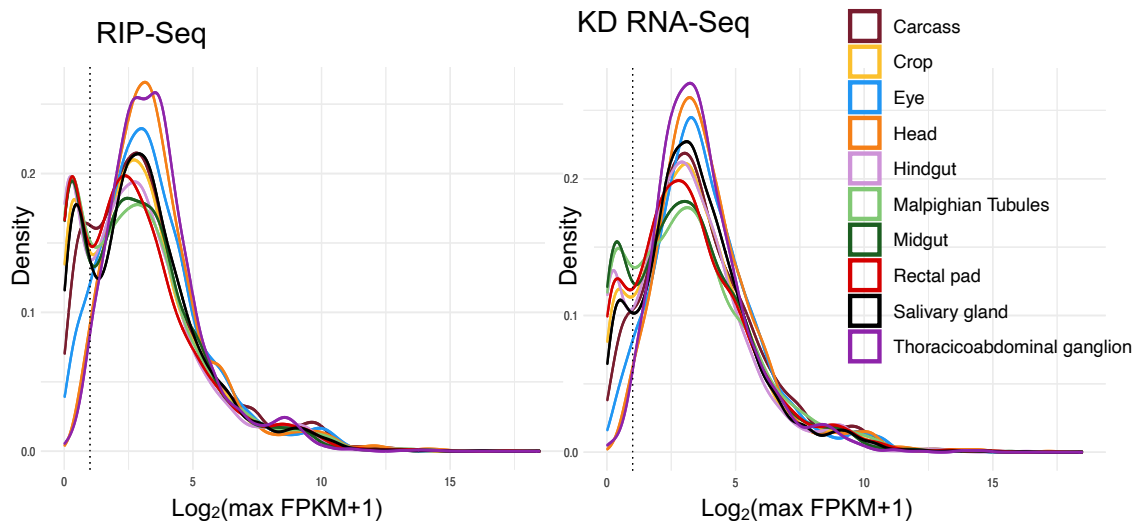

### D Adult brain expression density profile

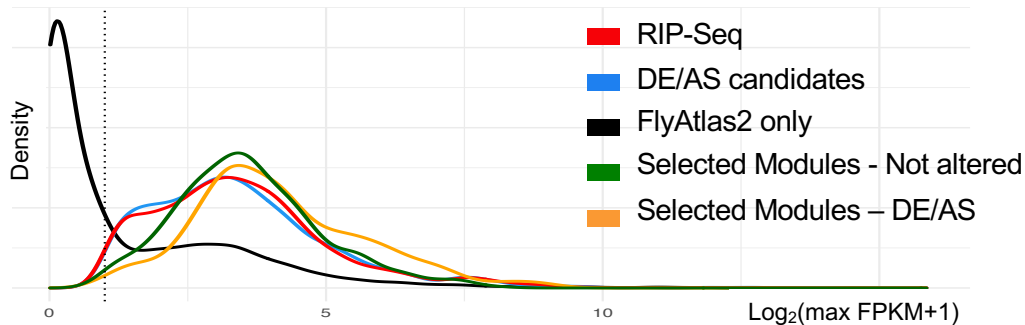

Supplement: Supplementary file [file media-3.pdf]
